# Supplementary material
Source: Springer Nature journal article supplement (https://www.springermedizin.de/resource/supplementary/12943_2014_1419_MOESM8_ESM.pdf/9552940)

Additional file 8: Figure S7

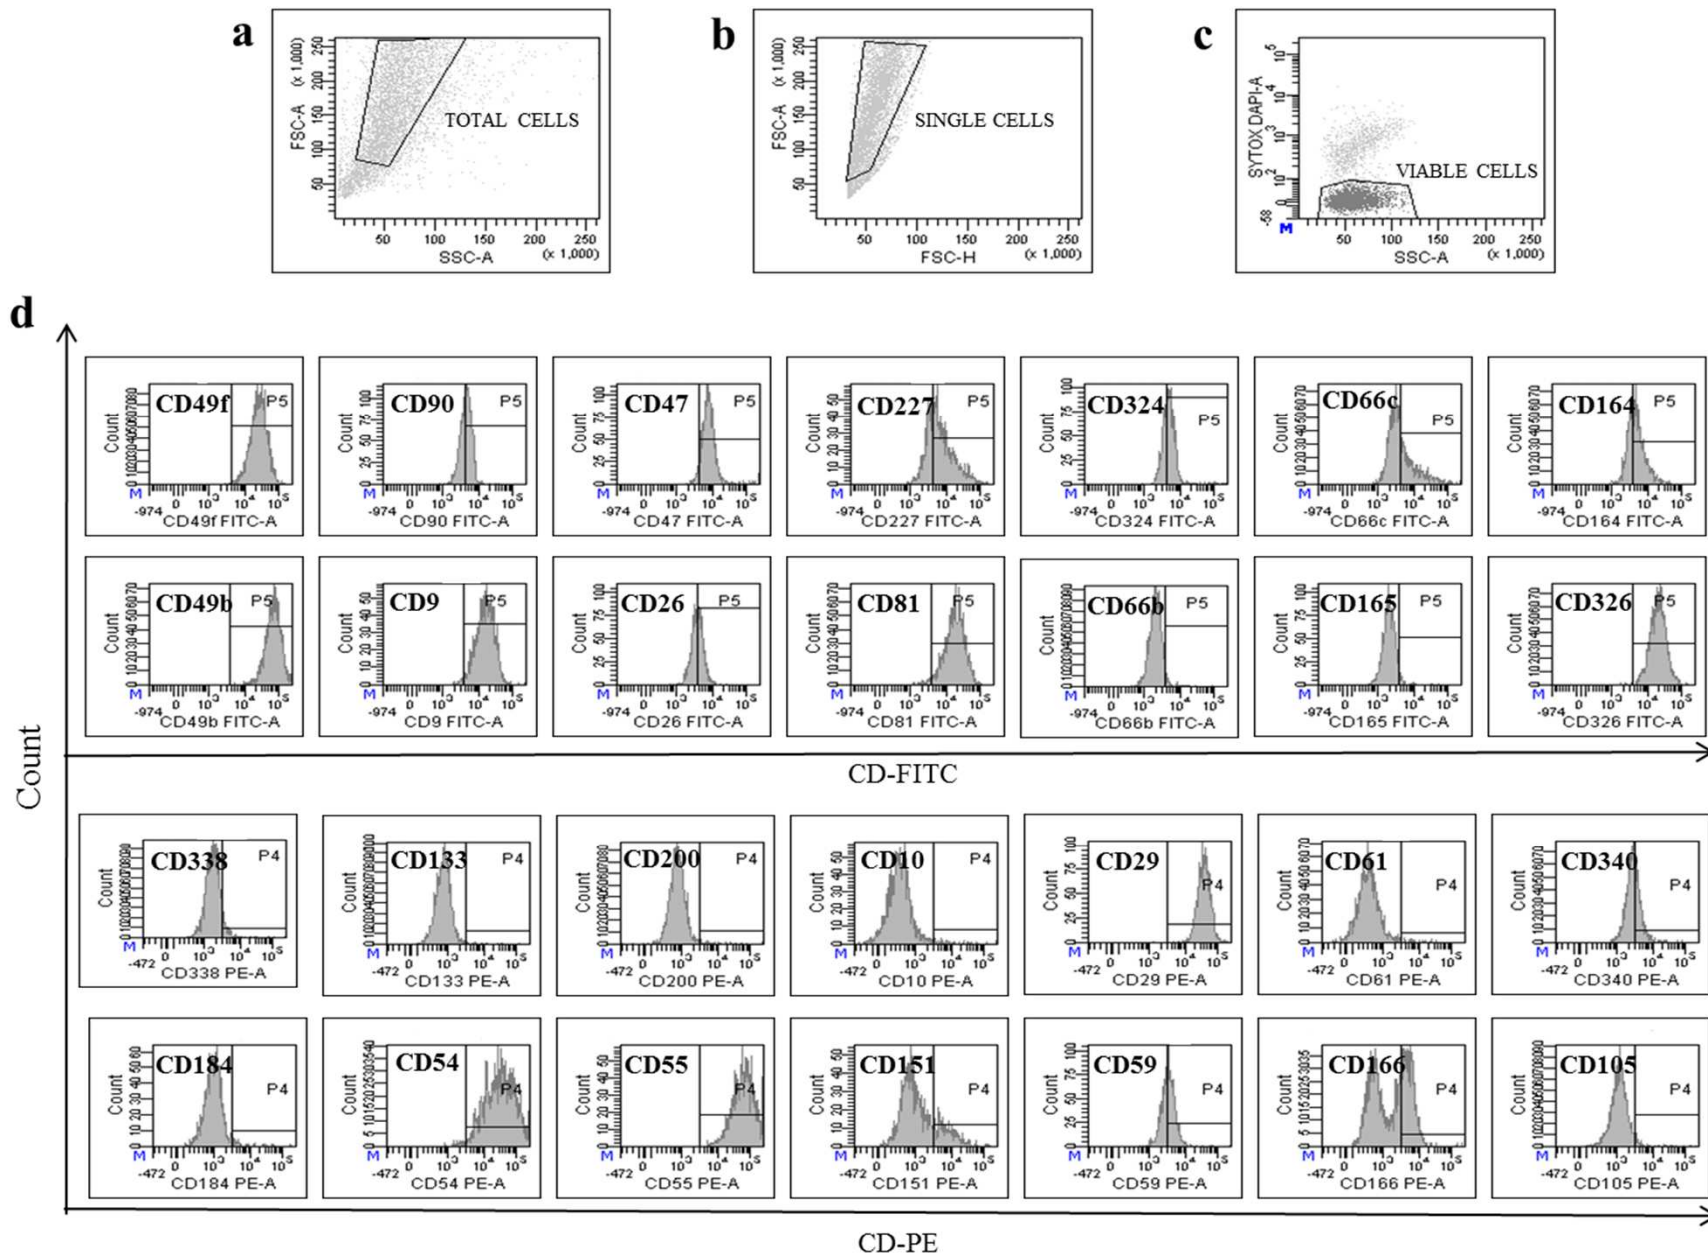

Supplement: MOESM8 [file 9552940]
